# Supplementary material for: Mutual Amplification of GLI2/Hedgehog and Transcription Factor JUN/AP‐1 Signaling in Fibroblasts in Systemic Sclerosis: Potential Implications for Combined Therapies
Source: PubMed Central journal article supplement — Arthritis Rheumatol. 2024 Oct 20;77(1):92–8. doi: 10.1002/art.42979 (PMC11684997; doi:10.1002/art.42979), 2024-10-20
Supplement: ART-77-92-s001.pdf [file ART-77-92-s001.pdf]

1 **Mutual amplification of GLI2/Hedgehog and cJUN/AP1 signaling in fibroblast**  
2 **activation in SSc – potential implications for combined therapies**

3 **Supplementary Material**

4 Christina Bergmann<sup>1,2</sup>(MD)\*, Sara Chenguiti Fakhouri<sup>1,2</sup>(MS), Thuong Trinh-Minh<sup>3,4</sup>(PhD),  
5 Tim Filla<sup>3,4</sup>(MS), Aleix Rius Rigau<sup>1,2</sup>(PhD), Arif B. Ekici<sup>5</sup>(PhD), Benita Merlevede<sup>1,2</sup>(MD),  
6 Ludwig Hallenberger<sup>1,2</sup>(MD), Zhu Honglin<sup>6</sup>(MD), Clara Dees<sup>1,2</sup>(PHD), Matei Alexandru-  
7 Emil<sup>3,4</sup>(MD), Janina Auth<sup>1,2</sup>(MD), Györfi Andrea-Hermina<sup>3,4</sup>(MD), Zhou Xiang<sup>3,4</sup>(PhD),  
8 Simon Rauber<sup>1,2</sup>(PhD), Aline Bozec<sup>1,2</sup>(PhD), Nicholas Dickel<sup>7</sup>(MS), Chunguang Liang<sup>7</sup>(PhD),  
9 Meik Kunz<sup>7,8,9</sup>(PD), Georg Schett<sup>1,2</sup>(MD), Jörg H.W. Distler<sup>3,4</sup>(MD)

10 <sup>1</sup> Department of Medicine 3 - Rheumatology and Immunology, Friedrich-Alexander-  
11 Universität Erlangen-Nürnberg (FAU) and Uniklinikum Erlangen, Erlangen, Germany;  
12 <sup>2</sup>Deutsches Zentrum für Immuntherapie (DZI), Friedrich-Alexander-Universität Erlangen-  
13 Nürnberg and Uniklinikum Erlangen; Erlangen, Germany; <sup>3</sup>Department of Rheumatology,  
14 University Hospital Düsseldorf, Medical Faculty of Heinrich Heine University, 40225,  
15 Düsseldorf, Germany; <sup>4</sup>Hiller Research Center, University Hospital Düsseldorf, Medical  
16 Faculty of Heinrich Heine University, 40225, Düsseldorf, Germany;<sup>5</sup>Institute of Human  
17 Genetics, Friedrich Alexander University Erlangen-Nuremberg and Uniklinikum Erlangen,  
18 Erlangen, Germany; <sup>6</sup>Department of Rheumatology and Immunology, Xiangya Hospital,  
19 Central South University, Changsha, Hunan, P.R. China. 410008; <sup>7</sup>Chair of Medical  
20 Informatics, Friedrich-Alexander University of Erlangen-Nürnberg, Erlangen, Germany;  
21 <sup>8</sup>Fraunhofer Institute for Toxicology and Experimental Medicine (ITEM), Hannover, Germany;  
22 <sup>9</sup>Fraunhofer Cluster of Excellence Immune-Mediated Diseases (CIMD), Hannover, Germany.

23  
24 **\*Corresponding author and reprint requests:** Christina Bergmann, MD; Department of  
25 Internal Medicine 3 - Rheumatology and Immunology, Friedrich-Alexander-University  
26 Erlangen-Nürnberg (FAU) and University Hospital Erlangen, Erlangen, Germany, Tel.: +49  
27 9131 43114, FAX: +49 9131 36448, Email: christina.bergmann@uk-erlangen.de  
28  
29  
30  
31  
32  
33

## 34 **Supplementary Material and Methods**

35

### 36 **Modulation of cJUN/AP-1 signaling and GLI2/Hedgehog-signaling *in vitro* and *in vivo***

37 The specific JUN/AP1- inhibitor T5224 (3-{5-[4-(Cyclopentyloxy)-2-hydroxybenzoyl]-2-[(3-  
38 hydroxy-1,2-benzisoxazol-6-yl)methoxy]phenyl}) propionic acid, ApexBio, Boston, MA,  
39 USA) and the GLI2 inhibitor GANT61 (2,2'-[[Dihydro-2-(4-pyridinyl)-1,3(2H,4H)-  
40 pyrimidinediyl]bis(methylene)]bis[N,N-dimethylbenzenamine, AdooQ, Irvine, CA, USA)  
41 were used to target AP1/cJUN- and GLI2/hedgehog-signaling *in vitro* and *in vivo*, respectively.  
42 For *in vitro* experiments, T5224 was applied at doses from 0.2  $\mu$ M to 40 $\mu$ M [1]. In subsets of  
43 experiments, fibroblasts were stimulated with TGF $\beta$  (Peprotech, Hamburg, Germany) at a  
44 concentration of 10ng/ml or with recombinant Sonic Hedgehog (SHH) (Peprotech, Hamburg,  
45 Germany) at a dose of 5ng/ml. For *in vivo* experiments, T5224 was applied at 3mg/kgKG/d  
46 (referred to as “T5224 low”) and 30mg/kgKG/d (referred to as “T5224 high”) by oral gavage;  
47 GANT61 was applied at 2mg/kgKg/d (referred to as “GANT61 low”) and 20mg/kgKg/d  
48 (referred to as “GANT61 high”) by intraperitoneal injection [2] .

49

### 50 **siRNA-mediated knockdown of *GLI2* and *cJUN* and overexpression of cJUN and GLI2**

51 *cJUN* and *GLI2* were knocked down with siRNA using the following siRNA products: ON-  
52 TARGET plus Human JUN siRNA (Catalog ID: L-003268-00-0010, horizon discovery,  
53 Germany) and ON-TARGET plus Human GLI2 siRNA (Catalog ID: L-006468-00-0010,  
54 horizon discovery, Germany). Knockdown was performed using the nucleofection technique as  
55 previously described [3, 4]. Briefly, healthy human dermal fibroblasts were transfected with 2,5  
56  $\mu$ g of siRNA using an Amaxa 4D-Nucleofector Kit (Lonza, Cologne, Germany). Non-targeting  
57 siRNA duplexes (Catalog ID: D-001910-10-20, horizon discovery, Germany) served as  
58 controls. Effective knockdown of cJUN and GLI2 was confirmed by Western blot analysis.

59 To overexpress cJUN and GLI2 the following plasmids were used: c-JUN cDNA ORF Clone  
60 (HG11886-UT, Hölzel Diagnostika, Cologne, Germany) and GLI2 cDNA ORF Clone  
61 (HG18067-UT, Hölzel Diagnostika, Cologne, Germany). Plasmids were amplified in DH5 $\alpha$   
62 E.coli (C2987H, New England Biolabs, Frankfurt am Main, Germany). Positive clones were  
63 then selected with lysogeny broth medium supplemented with 1:1000 ampicillin. Single  
64 colonies were picked and amplified and the plasmids were isolated using a commercial kit  
65 (QIAGEN, Hamburg, Germany).

66 Healthy human dermal fibroblasts were transfected with 2,5  $\mu$ g of plasmid using an Amaxa 4D-  
67 Nucleofector Kit (Amaxa, Cologne, Germany). Fibroblasts transfected with empty vectors  
68 served as controls (CV011, Sino biological, Cologne, Germany). The overexpression of cJUN-  
69 and GLI2-protein was confirmed by Western blot analysis, respectively.

70

### 71 **Quantitative real time-PCR**

72 Gene expression was quantified by SYBR-Green real-time-PCR using the MX3005P Detection  
73 System (Agilent Technologies, Santa Clara, USA) as described [3]. RNA was isolated using a  
74 Nucleospin RNA isolation kit (Macherey-Nagel, Düren, Germany). Reverse transcription was  
75 then performed and cDNA samples were mixed with SYBRGreen PCR Master Mix (Applied  
76 Biosystems, Darmstadt, Germany). Samples without reverse transcriptase-enzyme were used  
77 as negative controls. All primers are summarized in supplementary table 1. Gene expression  
78 levels were assessed through the comparative CT method using  $\beta$ -actin as a house keeping gene.  
79 The StepOnePlus Real-Time PCR System (Applied Biosystems, Darmstadt, Germany) was  
80 used to perform Real-time PCR. Unspecific signals caused by primer dimers were excluded by  
81 non-template controls and by dissociation curve analysis.

82

83

84

## 85 **Western Blot analysis**

86 Cell lysates were collected from cultured fibroblasts using Cell Lysis Buffer (Cell Signaling  
87 Technology, Frankfurt am Main, Germany). Protein samples were separated by SDS-  
88 polyacrylamide gel electrophoresis and transferred to polyvinylidene fluoride membranes [4].  
89 After blocking, membranes were incubated with primary antibodies at 4°C overnight (list of  
90 primary antibodies in supplementary table 2). Membranes were incubated with horseradish-  
91 peroxidase-conjugated secondary antibodies and Amersham ECL Prime Western Blotting  
92 Detection Reagent (Cytiva, Freiburg, Germany). Blots were then visualized using a ChemiDoc  
93 MP Imaging System (Bio-Rad Laboratories, Feldkirchen, Germany) and analyzed with the  
94 ImageJ software (NIH, version 1.46).

95

## 96 **ChIP-Sequencing**

97 Healthy human dermal fibroblasts were transfected with 2,5 µg of the following plasmids: c-  
98 JUN cDNA ORF Clone (HG11886-UT, Hölzel Diagnostika, Cologne, Germany) and GLI2  
99 cDNA ORF Clone, (HG18067-UT, Hölzel Diagnostika, Cologne, Germany) using an Amaxa  
100 4D-Nucleofector (Amaxa, Cologne, Germany). Fibroblasts transfected with empty vectors  
101 (CV011, Sino biological, Cologne, Germany) served as controls. Cells were selectively  
102 stimulated with TGFβ (10 ng/ml; PeproTech, Hamburg, Germany) for 24 hours. ChIP assays  
103 were performed using the ChIP-IT High Sensitivity Kit (Active Motif, Eching, Germany). After  
104 TGFβ stimulation, cells were fixated according to the manufacturer's instructions and  
105 chromatin was sonicated using an EpiShear™ Probe Sonicator (Active Motif, Eching,  
106 Germany). Sonicated chromatin was incubated with antibodies targeting cJUN (ab31419,  
107 Abcam, Cambridge, United Kingdom) and GLI2 (sc-271786 X, Santa Cruz Biotechnology,  
108 Heidelberg, Germany) or rabbit IgG antibody (#NI01; Millipore, Darmstadt, Germany). After  
109 immunoprecipitation, enriched DNA was sequenced by the Institute of Human Genetics at the  
110 University Hospital Friedrich-Alexander-University Erlangen-Nürnberg. ChIP-seq libraries

111 were generated using the NEBNext Ultra II DNA Library Prep Kit (Illumina, Frankfurt am  
112 Main, Germany) and subjected to paired-end sequencing (2x150 bp) on a NovaSeq-6000  
113 platform (Illumina, Frankfurt am Main, Germany).

114

#### 115 **Analysis of CHIP-Sequencing data**

116 Raw data (fastq files) were uploaded to the Galaxy web platform, and the public server at  
117 usegalaxy.eu was used for data analysis. Raw reads were trimmed out of the Illumina adapter  
118 by using the function TrimGalore with the default setting at usegalaxy.eu. Trimmed reads were  
119 aligned to the hg38 genome using Bowtie2, with the default setting for pair-end reads. MACS2  
120 was used for peak calling with a bandwidth of 300, and peaks were filtered using an FDR-  
121 corrected q-value of 0.05 as well as removing peaks in the hg38 blacklist area. Peak annotation  
122 was done in R (version 4.3.1) using the "CHIPseeker" package. The g:Profiler web server was  
123 used to perform functional enrichment of Gene Ontology (Biological Process) with the  
124 Benjamini-Hochberg correction method to retrieve an adjusted-p value [11].

125

#### 126 **Immunofluorescence staining**

127 Formalin-fixed, paraffin-embedded tissue sections were incubated with the primary antibodies  
128 listed in supplementary table 3 overnight at 4°C. Concentration-matched isotype antibodies  
129 were used as controls [3]. To perform immunofluorescence analysis of cultured fibroblasts,  
130 dermal fibroblasts were seeded into chamber slides in DMEM F12 (Thermofisher Scientific,  
131 Dreieich, Germany) with 10% FBS (Thermofisher Scientific, Dreieich, Germany) for 24h.  
132 After 24h of serum starvation with DMEMF12 with 0.1% FBS, cells were stimulated with  
133 TGFβ (Peprotech, Hamburg, Germany) or SHH (Peprotech, Hamburg, Germany) for 24h.  
134 Fixation and permeabilization was performed as previously described. Incubation with anti-  
135 αSMA specific antibodies (supplementary table 2) was performed over night at 4°C. Stress  
136 fibers were visualized with rhodamine-conjugated phalloidin (1:40, #R415, Sigma-Aldrich,

137 Germany). Nuclei were counterstained using 4',6-diamidino-2-phenylindole (DAPI) (1:800,  
138 #sc-3598 Santa Cruz Biotechnology, Heidelberg, Germany). Staining analyses were performed  
139 using a Nikon Eclipse 80i microscope (Nikon, Tokyo, Japan) and a Leica SP8 CLSM confocal  
140 microscope (Wetzlar, Germany). Images were quantified using ImageJ software (NIH, version  
141 1.46).

142

### 143 **Imaging Mass Cytometry (IMC)**

144 Imaging Mass Cytometry (IMC) was conducted as previously described [5-7]. Antibodies were  
145 either obtained pre-conjugated (Standard Biotech, Munich, Germany) or in purified  
146 preparations, which were initially validated through standard immunofluorescence staining.  
147 Purified antibodies were then labeled with lanthanide metals using the Maxpar X8 antibody  
148 labeling kit (Standard Biotech, Munich, Germany) according to the manufacturer's  
149 instructions. The complete panel was re-validated for IMC, and antibody titration was  
150 performed. Deparaffinization and epitope retrieval were carried out on 5 µm paraffin-embedded  
151 skin sections. Subsequently, the sections were blocked with 2% BSA (Roth, Karlsruhe,  
152 Germany) in PBS (ThermoFisher Scientific, Dreieich, Germany) and incubated overnight at 4°C  
153 with the antibody mix (in 0.5% BSA). The stained samples were then washed once with PBS-  
154 T [PBS (ThermoFisher Scientific, Dreieich, Germany) and 0.2% Tween 20 (Roth, Karlsruhe,  
155 Germany)] and twice in PBS for 5 min. DNA was stained with Iridium-Intercalator (125 µM)  
156 (Standard Biotech, Munich, Germany) 1/400 during 5 min at room temperature. The samples  
157 were then washed in PBS and deionized water before being dried and stored at room  
158 temperature.

159 Ablated areas were preselected using hematoxylin-eosin stained sections. Data acquisition was  
160 performed with the Hyperion Imaging System (Standard Biotech, Munich, Germany) coupled  
161 to a Helios mass cytometer (Standard Biotech, Munich, Germany) with laser ablation

162 parameters set at a resolution of 1  $\mu\text{m}^2$  and a frequency of 200 Hz. IMC data was saved as MCD  
163 and .txt files.

164

### 165 **IMC data analysis**

166 After confirmation of good staining quality on the MCD viewer software (Standard Biotoools,  
167 Munich, Germany), MCD files were converted to TIFF format. Cell segmentation was  
168 performed using a publicly available analysis pipeline (<https://zenodo.org/record/3841961>).  
169 Single cell data, including the mean expression of all pixels corresponding to each cell and  
170 spatial coordinates, were extracted as fcs and csv files, arcsinh normalized (cofactor 1) and  
171 rescaled from 0 to 1 using the R package Spectre [7]. Target populations were identified through  
172 manual gating and spatial referencing in the FlowJo software. Endothelial cells were defined as  
173 CD31+; immune cells were defined as CD45+; and the respective subsets were selected:  
174 cJUN+, cJUN-, GLI2+, GLI2-). Spatial distribution of distinct cell populations was visualized  
175 using the R package Cytomapper [8].

176

### 177 **Evaluation of fibrosis *in vivo***

178 To analyze skin fibrosis, dermal thickening, the expression of myofibroblasts and the dermal  
179 hydroxyproline content were analyzed. Dermal thickness at the injection sites was analyzed  
180 measuring the largest distance between the epidermal-dermal junction and the dermal-  
181 subcutaneous fat junction as described previously [4, 9]. The analysis was performed by an  
182 experienced assessor in a blinded manner. Sections were also stained with trichrome staining  
183 to directly visualize collagen. Myofibroblasts were identified as single, spindle shaped cells in  
184 the dermis positive for  $\alpha$ -smooth muscle actin [3]. To determine the hydroxyproline content of  
185 skin tissue samples, skin biopsies from the upper back were digested in HCl 6M (Roth,  
186 Karlsruhe, Germany) for 3 hours, then supplemented with chloramine-T 0,06M (Sigma-  
187 Aldrich, Steinheim, Germany) and incubated at room temperature for 20 minutes.

188 Subsequently, perchloric acid 3.15M (Merck, Darmstadt, Germany) and p-  
189 dimethylaminobenzaldehyde 20% (Thermofisher Scientific, Dreieich, Germany) were added,  
190 and samples were further incubated at 60°C for 20 minutes. Absorbance was measured at 557  
191 nm with a Spectra MAX 190 microplate spectrophotometer (Molecular Devices, Munich,  
192 Germany).

193

#### 194 **Reporter Assays**

195 For the Gli2 reporter assay, NIH3T3-Light2 cells were kindly provided by the group of Dr  
196 Natalie Dye (Max Planck Institute of Molecular Cell Biology and Genetics, Dresden,  
197 Germany). Cells were cultured in high glucose medium (#11965092, Thermofisher Scientific,  
198 Dreieich, Germany) supplemented with Zeocin at 150 ug/mL (#R25001, Thermofisher  
199 Scientific, Dreieich, Germany) and Geneticin (#10131027, Thermofisher Scientific, Dreieich,  
200 Germany) at 400 ug/mL. Cells were then selectively stimulated with TGFβ (Peprotech,  
201 Hamburg, Germany) at 10ng/ml and treated with T5224 (ApexBio, Boston, MA, USA) at 10μM,  
202 GANT61 (AdooQ, Irvine, CA, USA) at 20μM, or recombinant Sonic Hedgehog (SHH)  
203 (Peprotech, Hamburg, Germany) for 24 hours. Following that, the cells were assayed using the  
204 Dual-Glo® Luciferase Assay System (Promega, Walldorf, Germany) according to the  
205 manufacturer's instructions, and luminescence levels were measured at 500ms using a  
206 GloMax® Discover Microplate Reader (Promega, Walldorf, Germany).

207 For the cJun reporter assay, healthy human dermal fibroblasts were transfected with 2,5 μg of  
208 the following plasmid: Flag-JunWT-Myc (#47443, Addgene, Watertown, MA, USA), using the  
209 Fugene HD Transfection Reagent (Promega, Walldorf, Germany) according to the  
210 manufacturer's instructions. The cells were then selectively stimulated with TGFβ (Peprotech,  
211 Hamburg, Germany) at 10ng/ml and treated with T5224 (ApexBio, Boston, MA, USA) at 10μM,  
212 GANT61 (AdooQ, Irvine, CA, USA) at 20μM, or recombinant Sonic Hedgehog (SHH)  
213 (Peprotech, Hamburg, Germany) for 24 hours. Following that, the cells were assayed using the



214 Dual-Glo® Luciferase Assay System (Promega, Walldorf, Germany) according to the  
215 manufacturer's instructions, and luminescence levels were measured at 500ms using a  
216 GloMax® Discover Microplate Reader (Promega, Walldorf, Germany).

217

### 218 **Clinical monitoring of mice**

219 Mice were monitored for adverse events on a daily basis using an established, standardized  
220 monitoring scheme that included assessment of the body weight, physical activity, posture,  
221 texture of the fur and behavior [10]. In addition, mice were analyzed for toxic effects on  
222 necropsy.

223

### 224 **Statistics**

225 Data are presented as median with interquartile range (IQR) with additional dots representing  
226 individual values. Differences between the groups were tested by non-parametric Mann-  
227 Whitney-U-test using GraphPad Prism 9. P-values less than 0.05 were considered as significant.

228

229

230

231

232

233

234

235

236

237

238

239

240

241 **Supplementary tables**242 **Supplementary table 1.**

| <b>Target gene</b> | <b>Forward Primer Sequence</b>           | <b>Reverse Primer Sequence</b>      |
|--------------------|------------------------------------------|-------------------------------------|
| <i>B-ACTIN</i>     | 5'-AGA AAA TCT GGC ACC<br>ACA CC-3'      | 5'-TAG CAC AGC CTG GAT<br>AGC AA-3' |
| <i>COL1A1</i>      | 5'-ACG AAG ACA TCC CAC<br>CAA TC-3'      | 5'-ATG GTA CCT GAG GCC<br>GTT C-3'  |
| <i>b-actin</i>     | 5'-TCT TTG ATG TCA CGC<br>ACG AT-3'      | 5'-TAC AGC TTC ACC ACC<br>ACA-3'    |
| <i>Ptch2</i>       | 5'-CGG TGC TGA CAC TCT<br>TGG GCC-3'     | 5'-AGA GCA GCA CAG GCA<br>GCA GC-3' |
| <i>Axin2</i>       | 5'-GCC ACC AAG ACC TAC<br>ATA CGA-3'     | 5'-GAG CCG ATC TGT TGC<br>TTC TT-3' |
| <i>c-Myc</i>       | 5'-TGA AGG CTG GAT TTC<br>CTT TGG GCG-3' | 5'-ATC GTC GTG GCT GTC<br>GGG GT-3' |
| <i>cJun</i>        | 5'-CGC CTG ATC ATC CAG<br>TCC-3'         | 5'-GGG GTC GGT GTA GTG<br>GTG-3'    |
| <i>JunB</i>        | 5'-CAC AGG CGC ATC TCT<br>GAA-3'         | 5'-CGA TCA AGC GCT CCA<br>GTT-3'    |
| <i>JunD</i>        | 5'-ACT ACCCCG ACC AGT<br>ACG C-3'        | 5'-TCG CTA GCT GCC ACC<br>TTC-3'    |
| <i>Fra2</i>        | 5'-GAC CTG CAG TGG ATG<br>GTA CA-3'      | 5'-GGA TTG GAC ATG GAG<br>GTG AT-3' |
| <i>FosB</i>        | CAT GCC AGG AAC CAG CTA<br>CT            | CAG TGC TGT AGG CAC<br>TCA GG       |
| <i>FosC</i>        | 5'-TCC TGT CAA CAC ACA<br>GGA CTT T-3'   | 5'-GGC ACT AGA GAC GGA<br>CAG AT-3' |

243

244

245

246

247

248

249

250

251

252

253

254 **Supplementary table 2: Antibodies used for immunofluorescence and Western Blot.**

| Target                | Species/clonality | Cat. No.     | Company                                       | Application | Dilution        |
|-----------------------|-------------------|--------------|-----------------------------------------------|-------------|-----------------|
| cJUN (h)<br>cJun (m)  | rb mab            | ab32137      | Abcam,<br>Cambridge, UK                       | IF<br>WB    | 1:100<br>1:2000 |
| GLI2 (h)              | ms mab            | sc27178<br>6 | Santa Cruz,<br>Dallas, Texas,<br>USA          | IF          | 1:100           |
| Gli2 (m)              | gt pab            | AF3635       | R&D,<br>Minneapolis,<br>Minnesota, USA        | IF          | 1:1000          |
| P4H $\beta$ (h)       | gt pab            | AF4236       | R&D,<br>Minneapolis,<br>Minnesota, USA        | IF          | 1:200           |
| Vimentin<br>(m)       | rt pab            | ab20346      | Abcam,<br>Cambridge, UK                       | IF          | 1:1000          |
| pcJUN (h)             | ms mab            | sc-288       | Santa Cruz,<br>Dallas, Texas,<br>USA          | WB          | 1:1000          |
| $\beta$ -ACTIN<br>(h) | ms mab            | A5441        | Sigma Aldrich,<br>St. Louis,<br>Missouri, USA | WB          | 1:10 000        |
| $\alpha$ SMA (h)      | ms mab            | A5228        | Sigma Aldrich,<br>Germany                     | IF          | 1:1000          |

255

256 **Supplementary table 3: IMC antibody panel**

| Metal | Antigen   | Species/clonality | Company              | Cat. No.  | Dilution |
|-------|-----------|-------------------|----------------------|-----------|----------|
| 145Nd | CD31      | gt pab            | Sigma                | AF3628    | 1:200    |
| 152Sm | CD45      | D9M8I             | Standard<br>Biotools | 3152018D  | 1:200    |
| 149Sm | GLI2      | ms mab            | Santa Cruz           | sc-271786 | 1:100    |
| 171Yb | cJUN      | rb mab            | abcam                | ab32137   | 1:200    |
| 176Yb | Histone-3 | D1H2              | Standard<br>Biotools | 3176023D  | 1:1600   |

257

258

259

260

261

262

263

264 **Supplementary References**

- 265 1. Avouac J, Palumbo K, Tomcik M, Zerr P, Dees C, Horn A, Maurer B, Akhmetshina A, Beyer C,  
266 Sadowski A, Schneider H, Shiozawa S, Distler O, Schett G, Allanore Y, Distler JH. *Arthritis Rheum.*  
267 2012.10.1002/art.33501
- 268 2. Liang R, Sumova B, Cordazzo C, Mallano T, Zhang Y, Wohlfahrt T, Dees C, Ramming A,  
269 Krasowska D, Michalska-Jakubus M, Distler O, Schett G, Senolt L, Distler JH. *Ann Rheum Dis.*  
270 2017.10.1136/annrheumdis-2016-209698
- 271 3. Bergmann C, Brandt A, Merlevede B, Hallenberger L, Dees C, Wohlfahrt T, Pötter S, Zhang Y,  
272 Chen CW, Mallano T, Liang R, Kagwiria R, Kreuter A, Pantelaki I, Bozec A, Abraham D, Rieker R, Ramming  
273 A, Distler O, Schett G, Distler JHW. *Ann Rheum Dis.* 2018.10.1136/annrheumdis-2017-211501
- 274 4. Dees C, Pötter S, Zhang Y, Bergmann C, Zhou X, Lubner M, Wohlfahrt T, Karouzakis E, Ramming  
275 A, Gelse K, Yoshimura A, Jaenisch R, Distler O, Schett G, Distler JH. *J Clin Invest.* 2020.10.1172/jci122462
- 276 5. Györfi AH, Matei AE, Fuchs M, Liang C, Rigau AR, Hong X, Zhu H, Lubner M, Bergmann C, Dees  
277 C, Ludolph I, Horch RE, Distler O, Wang J, Bengsch B, Schett G, Kunz M, Distler JHW. *J Exp Med.*  
278 2021.10.1084/jem.20201916
- 279 6. Rius Rigau A, Li YN, Matei AE, Györfi AH, Bruch PM, Koziel S, Devakumar V, Gabrielli A, Kreuter  
280 A, Wang J, Dietrich S, Schett G, Distler JHW, Liang M. *Circ Res.* 2024.10.1161/circresaha.123.323299
- 281 7. Ashhurst TM, Marsh-Wakefield F, Putri GH, Spiteri AG, Shinko D, Read MN, Smith AL, King NJC.  
282 *Cytometry A.* 2022.10.1002/cyto.a.24350
- 283 8. Eling N, Damond N, Hoch T, Bodenmiller B. *Bioinformatics.*  
284 2020.10.1093/bioinformatics/btaa1061
- 285 9. Huang J, Beyer C, Palumbo-Zerr K, Zhang Y, Ramming A, Distler A, Gelse K, Distler O, Schett G,  
286 Wollin L, Distler JH. *Ann Rheum Dis.* 2016.10.1136/annrheumdis-2014-207109
- 287 10. Zerr P, Palumbo-Zerr K, Distler A, Tomcik M, Vollath S, Munoz LE, Beyer C, Dees C, Egberts F,  
288 Tinazzi I, Del Galdo F, Distler O, Schett G, Spriewald BM, Distler JH. *Blood.* 2012.10.1182/blood-2012-  
289 01-403428
- 290 11. Kolberg L, Raudvere U, Kuzmin I, Adler P, Vilo J, Peterson H. *Nucleic Acids Research*, May 2023
