# Supplementary material for: Mutual Amplification of GLI2/Hedgehog and Transcription Factor JUN/AP‐1 Signaling in Fibroblasts in Systemic Sclerosis: Potential Implications for Combined Therapies
Source: PubMed Central journal article supplement — Arthritis Rheumatol. 2024 Oct 20;77(1):92–8. doi: 10.1002/art.42979 (PMC11684997; doi:10.1002/art.42979), 2024-10-20
Supplement: ART-77-92-s003.pdf [file ART-77-92-s003.pdf]

# Mutual amplification of GLI2/Hedgehog and cJUN/AP1 signaling in fibroblast activation in Systemic Sclerosis (SSc) – potential implications for combined therapies

## - Supplementary Figures -

Christina Bergmann<sup>1,2</sup> (MD)\*, Sara Chenguiti Fakhouri<sup>1,2</sup> (MS), Thuong Trinh-Minh<sup>3,4</sup> (PhD), Tim Filla<sup>3,4</sup> (MS), Aleix Rius Rigau<sup>1,2</sup> (PhD), Arif B. Ekici<sup>5</sup> (PhD), Benita Merlevede<sup>1,2</sup> (MD), Ludwig Hallenberger<sup>1,2</sup> (MD), Zhu Honglin<sup>6</sup> (MD), Clara Dees<sup>1,2</sup> (PHD), Alexandru-Emil Matei<sup>3,4</sup> (MD), Janina Auth<sup>1,2</sup> (MD), Andrea-Hermina Györfi<sup>3,4</sup> (MD), Xiang Zhou<sup>3,4</sup> (PhD), Simon Rauber<sup>1,2</sup> (PhD), Aline Bozec<sup>1,2</sup> (PhD), Nicholas Dickel<sup>7</sup> (MS), Liang Chunguang<sup>7</sup> (PhD), Meik Kunz<sup>7,8,9</sup> (PD), Georg Schett<sup>1,2</sup> (MD), Jörg H.W. Distler<sup>3,4</sup> (MD)

<sup>1</sup> Department of Medicine 3 - Rheumatology and Immunology, Friedrich-Alexander-Universität Erlangen-Nürnberg (FAU) and Uniklinikum Erlangen, Erlangen, Germany; <sup>2</sup>Deutsches Zentrum für Immuntherapie (DZI), Friedrich-Alexander-Universität Erlangen-Nürnberg and Uniklinikum Erlangen; Erlangen, Germany; <sup>3</sup>Department of Rheumatology, University Hospital Düsseldorf, Medical Faculty of Heinrich Heine University, 40225, Düsseldorf, Germany; <sup>4</sup>Hiller Research Center, University Hospital Düsseldorf, Medical Faculty of Heinrich Heine University, 40225, Düsseldorf, Germany; <sup>5</sup>Institute of Human Genetics, Friedrich Alexander Universität Erlangen-Nürnberg and Uniklinikum Erlangen, Erlangen, Germany; <sup>6</sup>Department of Rheumatology and Immunology, Xiangya Hospital, Central South University, Changsha, Hunan, P.R. China. 410008; <sup>7</sup>Chair of Medical Informatics, Friedrich-Alexander Universität Erlangen-Nürnberg, Erlangen, Germany; <sup>8</sup>Fraunhofer Institute for Toxicology and Experimental Medicine (ITEM), Hannover, Germany; <sup>9</sup>Fraunhofer Cluster of Excellence Immune-Mediated Diseases (CIMD), Hannover, Germany

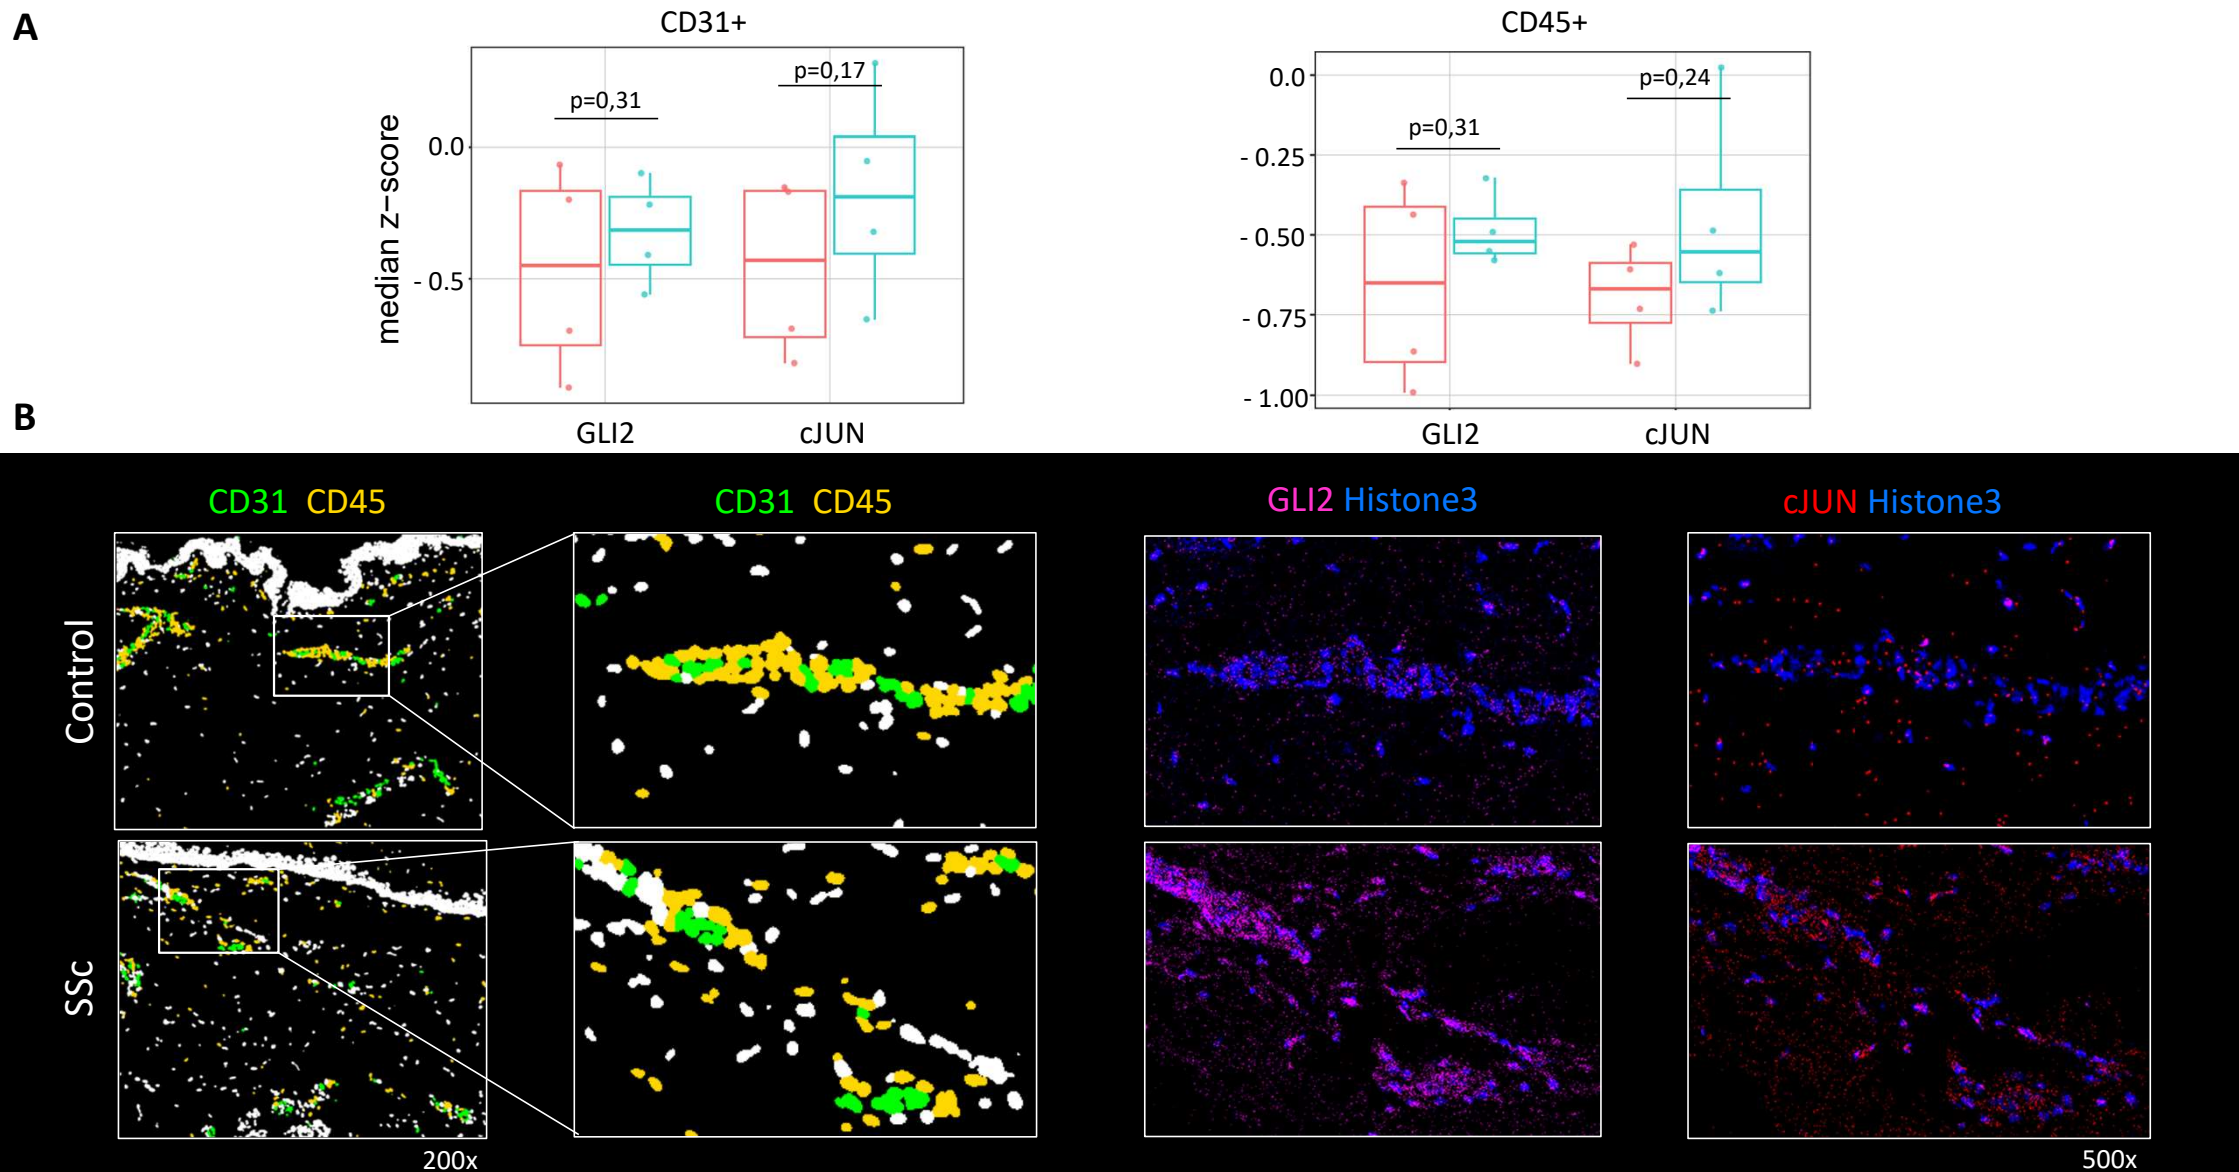

**Supplementary figure 1: GLI2 and cJUN are upregulated in endothelial cells and immune cells in SSc skin compared to controls.**

**A.** Median z-score of GLI2 and cJUN expression in CD31+ and CD45+ cell populations as detected by imaging mass cytometry (IMC) in SSc skin sections compared with healthy controls. **B.** Corresponding imaging mass cytometry (IMC) images with expression of CD31 (green), CD45 (yellow), GLI2 (magenta), cJUN (red) (n=4 individual samples)

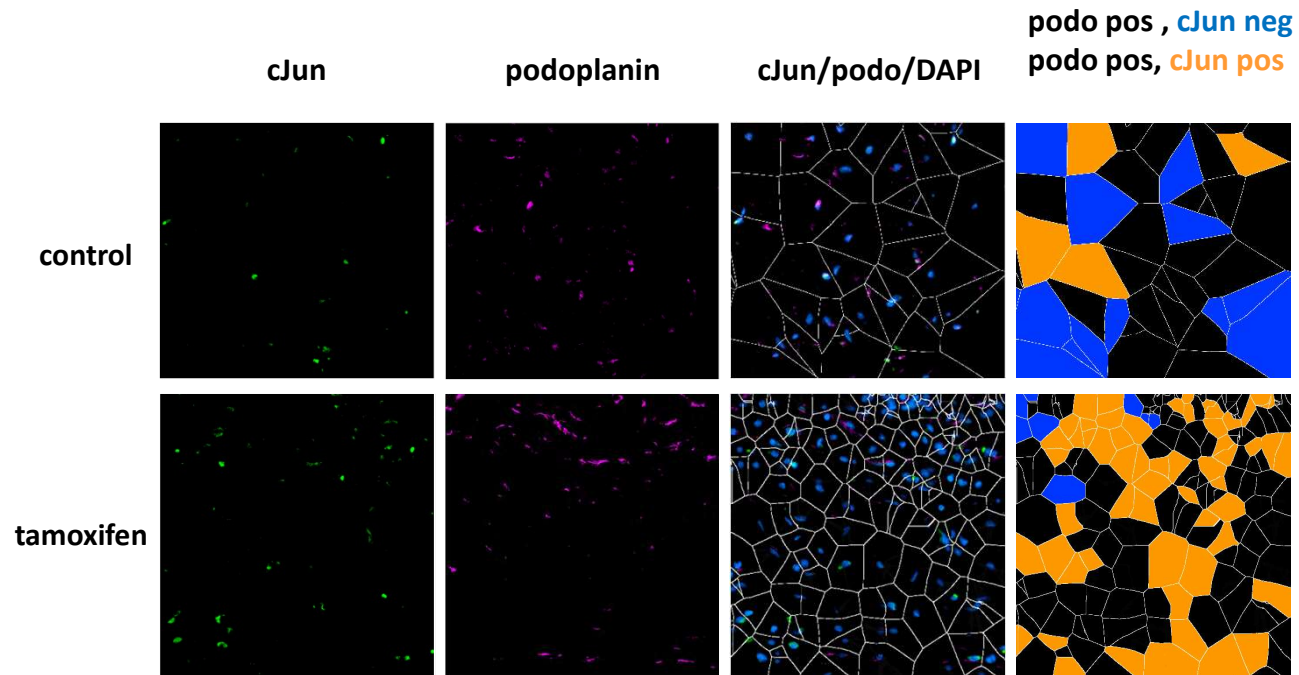

**Supplementary figure 2: Immunofluorescence staining of cJun in  $\text{Smo}^{\text{ACT}}$  mice.**

Upregulation of cJun<sup>+</sup> fibroblasts in the skin of  $\text{Smo}^{\text{ACT}}$  mice. Representative immunofluorescence stainings for cJun (green), the fibroblast marker podoplanin (purple) and DAPI (blue) are shown at 1000-fold magnification (n=2 with 2 technical replicates). Voronoi tessellations are shown.

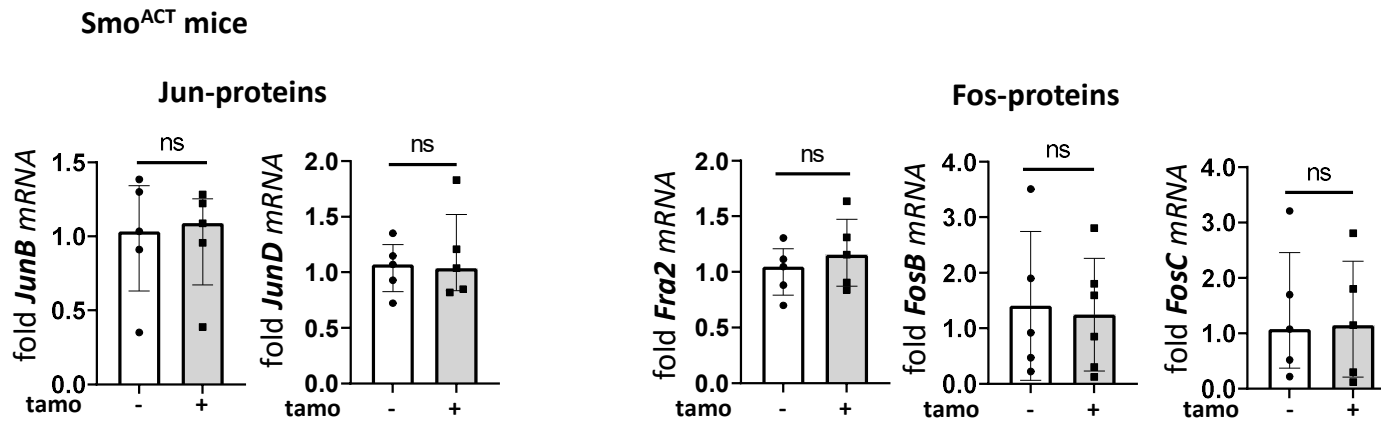

**Supplementary figure 3:** Analysis of the mRNA-expression of *JunB*, *JunD*, *Fra2*, *FosB*, *FosC* in Smo<sup>ACT</sup> mice (n=5/group, 1-2 technical replicates). Data are presented as median with interquartile range. Tamo=tamoxifen. P-values < 0.05 were considered significant.

**A**  $Gli2^{fl/fl}; Col1a2-Cre-ER$  mice

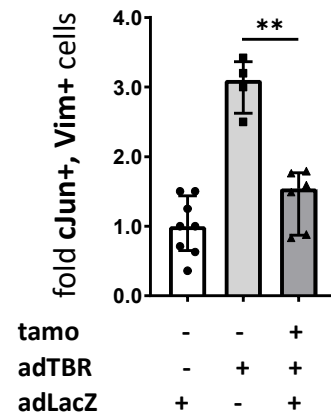

**B**  $Smo^{ACT}$  mice

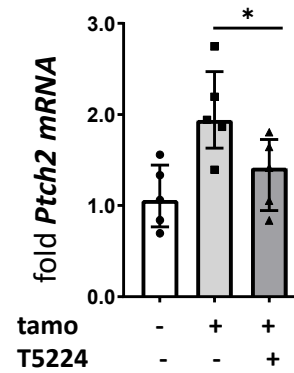

**Supplementary figure 4: A.** Fold cJun+, Vimentin+ cells in mice with conditional, fibroblast-specific knockout of *Gli2* and additional treatment with adTBRvirus (n=4/group, 1-2 technical replicates) compared to mice treated with adLacZ. **B.** mRNA expression of *Ptch2* in  $Smo^{ACT}$  mice (n=5/group). Data are presented as median with interquartile range. P-values < 0.05 were considered significant. Tamo=tamoxifen, adLacZ=attenuated adenovirus encoding for LacZ, adTBR= attenuated adenovirus encoding for constitutively active TGF $\beta$  receptor 1.

**A**  
**GLI2 binding sites in JUN-Promotor (-5000 to + 1000kb)**

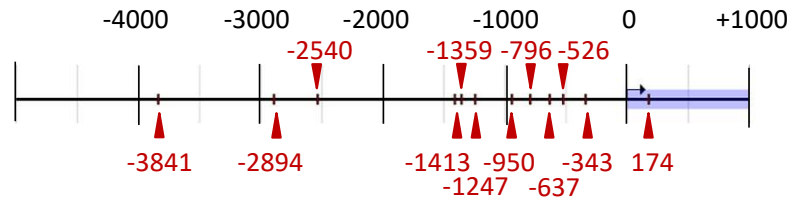

**AP1 reporter assay**

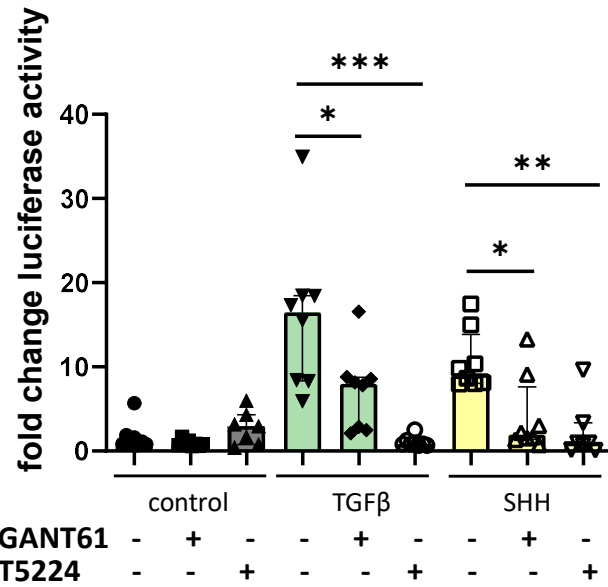

**B**  
**JUN binding sites in Gli2-Promotor (-5000 to + 1000kb)**

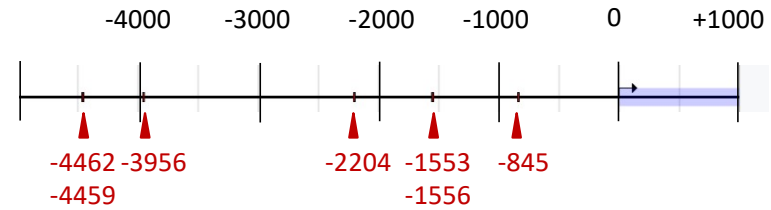

**GLI-dependent reporter cell line (Light2 cells)**

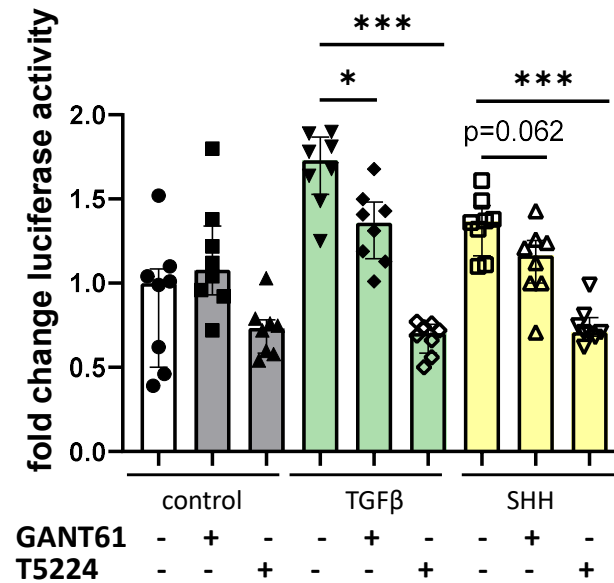

**Supplementary figure 5: A. Top:** Schematic representation of putative GLI2 binding sites in the JUN promoter region (-5000 to + 1000kb) as analyzed using the Eukaryotic Promoter database (EPD). **Bottom:** AP1 reporter assay: Inhibition of GLI2 reduces AP1-dependent transcription in fibroblasts stimulated with recombinant TGFβ or SHH (n=8 replicates per group). **B. Top:** Schematic representation of putative cJUN binding sites in the Gli2-promotor (-5000 to + 1000kb). **Bottom:** GLI-dependent reporter assay using Light2 cells: Inhibition of cJUN/AP1 reduces GLI-dependent transcription in hedgehog-responsive Light2-reporter cells stimulated with TGFβ or SHH (n=8 replicates per group). Results are presented as median with interquartile range.

**A**

**ChIP: CJUN**

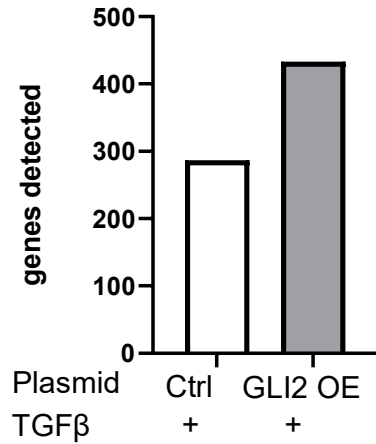

**ChIP: GLI2**

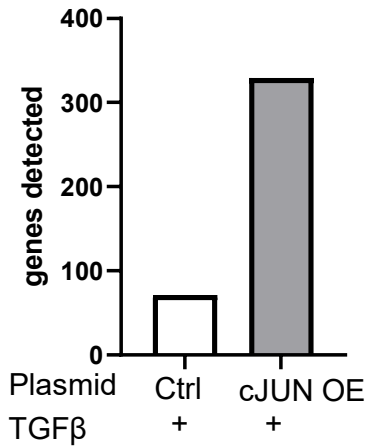

**B**

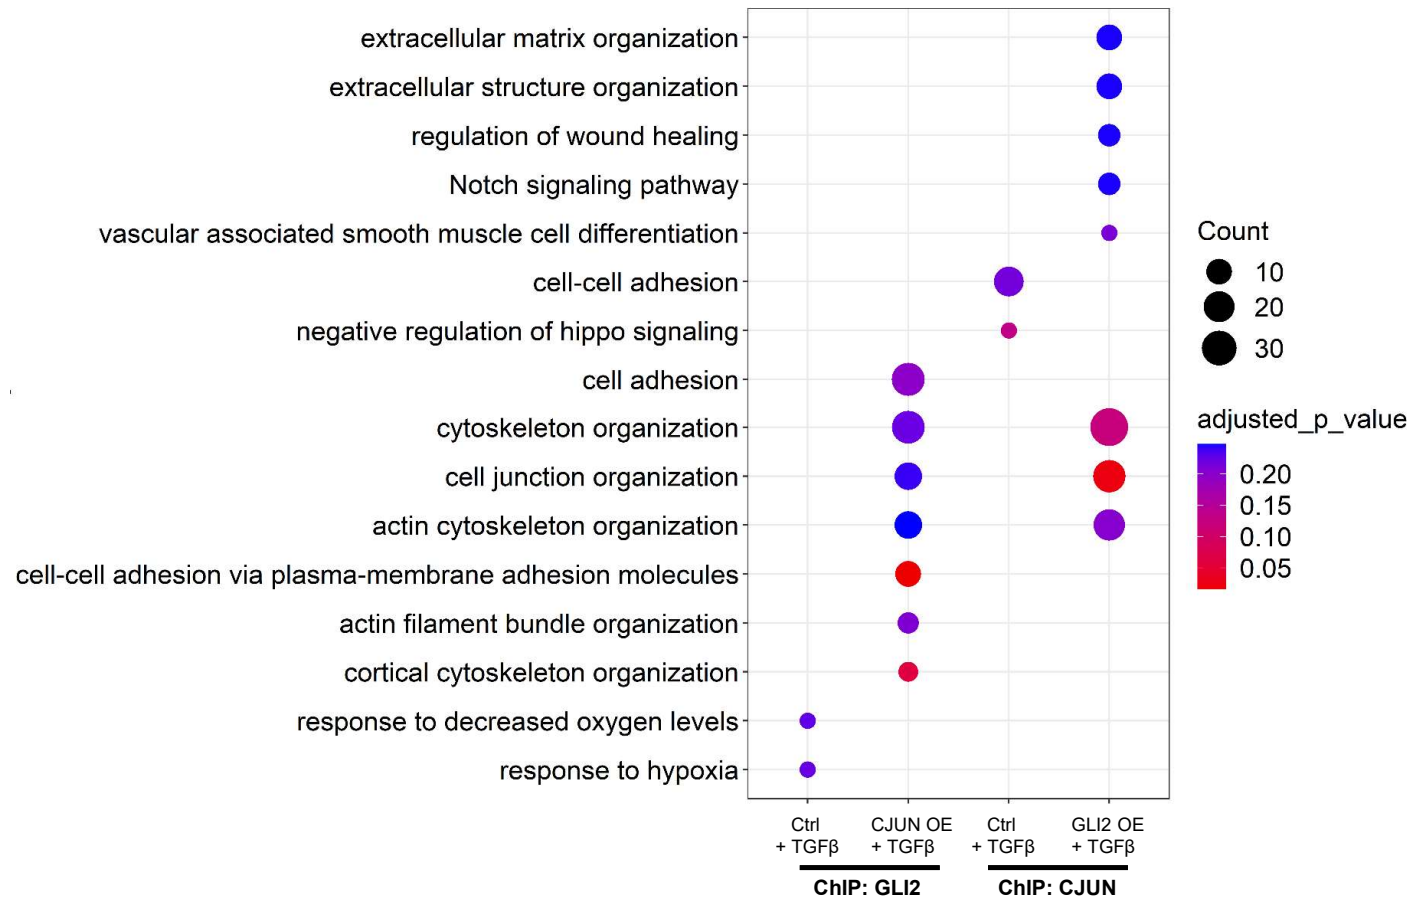

**Supplementary figure 6: ChIP Sequencing of samples precipitated for cJUN upon overexpression of GLI2 and stimulation with TGFβ (gene counts of 2 cell lines included) compared to TGFβ alone (gene counts of 3 cell lines included) and ChIP sequencing of samples precipitated for GLI2 upon overexpression of cJUN and stimulation with TGFβ (gene counts of 2 cell lines included) compared to TGFβ stimulation alone (gene counts of 3 cell lines included). A. Bar graphs of genes detected in the respective comparisons across all cell lines. B. Results of GO-term analysis of the differentially regulated genes. Ctrl=control, OE=overexpression.**
